# Supplementary material
Source: publisher figshare collection journal article supplement (https://diabetesjournals.figshare.com/articles/dataset/_/13626788)
Supplement: Supplementary file 1 [file 26153972]

## **Supplemental Procedures**

### ***Oral glucose tolerance test***

The 75-g OGTT was initiated by venous blood sampling at baseline (0 min) followed by ingestion of an oral glucose load of 75-g glucose in 225 mL (Torelan G 75; Shimizu Pharmaceuticals, Shimizu, Japan). Additional venous blood samples were collected at 30, 60, and 120 min after ingesting the oral glucose load and centrifuged at 4 °C prior to measurement of glucose, insulin, GLP-1, and gastric inhibitory polypeptide (GIP) levels.

Area under the curve (AUC) calculations were performed using the trapezoidal rule. Insulin resistance was evaluated using the homeostatic model assessment of insulin resistance (HOMA-IR) and the Matsuda index, while  $\beta$ -cell function was evaluated using the homeostatic model assessment of  $\beta$ -cell function (HOMA- $\beta$ ) and insulinogenic index (II). HOMA-IR was calculated as  $\text{fasting insulin } (\mu\text{U/mL}) \times \text{fasting glucose} / 405 \text{ (mg/dL)}$  (1). The Matsuda index was calculated as  $10,000 / \text{square root of } [\text{fasting glucose (mg/dL)} \times \text{fasting insulin } (\mu\text{U/mL}) \times \text{mean glucose (mg/dL)} \times \text{mean insulin } (\mu\text{U/mL}) \text{ during OGTT}]$  (2). HOMA- $\beta$  was calculated as  $360 \times \text{fasting insulin } (\mu\text{U/mL}) / (\text{fasting glucose (mg/dL)} - 63)$  (1). The insulinogenic index was calculated as the increase in insulin levels from 0 to 30 min divided by the increase in glucose levels from 0 to 30 min during 75-g OGTT (3).

### ***Clinical and laboratory data***

Measurement of systolic and diastolic blood pressure, HbA1c, serum creatinine, and eGFR was performed as previously described (4). Plasma levels of active

GLP-1 and GIP were quantified using an enzyme-linked immunosorbent assay kit (GLP-1 Active Form Assay Kit-IBL and Human GIP Active form Assay kit-IBL; Immuno-Biological Laboratories, Fujioka, Japan) using a blood sampling tube containing an anticoagulant, protease inhibitor, and dipeptidyl peptidase-4 inhibitors. Performance status was calculated using the Zubrod scale (5).

Lipopolysaccharides (LPS) were analyzed using a high-sensitivity kinetic turbidimetric Limulus test with an ET-6500 Toxinometer (Wako Pure Chemical Industries, Ltd. Osaka, Japan) according to manufacturer's instructions, with the following modifications: samples were diluted 10-fold and preheated to 70 °C for 10 min prior to analysis to dissolve immune complexes. Samples obtained before surgery and 6 months after surgery were analyzed in the same run to minimize inter-assay and intra-assay variability. C-reactive protein (CRP) levels were measured using the latex agglutination method.

### ***Resected volume estimation of the normal pancreatic region***

To determine the resected volume of the normal pancreas by partial pancreatectomy, we used images obtained using multidetector-row computed tomography. The volume of the normal pancreas was calculated as the normal pancreatic region of a slice multiplied by the slice thickness (2–5 mm) using ImageJ/Fiji (NIH, Bethesda, MD; <http://imagej.nih.gov/ij/>). The percentage resected volume of the normal pancreas was determined as follows: (total volume of normal pancreas before surgery – total volume of normal pancreas after surgery)/total volume of normal pancreas before surgery  $\times$  100.

### ***Microbiota analysis***

After removing sequences consistent with data from the Genome Reference Consortium Human Build 38 (GRCh38) and phiX 174 reads from the raw Illumina paired-end reads, sequences were analyzed using QIIME2 version 2017.10 (<https://qiime2.org/>). Potential chimeric sequences were removed using DADA2 (6), followed by trimming 30 and 90 bases of the 3' region of the forward and reverse reads, respectively. Taxonomical classification was performed using the Naive Bayes classifier trained on Greengenes 13.8 with a 99% threshold of operational taxonomic unit full-length sequences. UniFrac distances and alpha diversities (Chao 1 and Shannon index) were calculated using QIIME2.

### ***Measurement of fecal short chain fatty acids (SCFAs) and bile acids (BAs)***

SCFAs were measured by suspending 50 mg of fecal sample in water (10%, w/v), followed by centrifugation. Next, 5-sulfosalicylic acid (2%, v/v) was added to the supernatant and incubated at 4 °C for 15 min. The samples were centrifuged, and 2-ethylbutyric acid was added to the supernatant to a final concentration of 100 µM as an internal standard, followed by hydrochloric acid (5%), and diethyl ether (200%). After mixing and centrifugation, the organic layer (containing SCFAs) was transferred to a vial. The remaining aqueous layer was re-extracted using diethyl ether, and the combined organic layer was analyzed using gas chromatography–mass spectrometry (GCMS-QP2010 Ultra; Shimadzu, Kyoto, Japan). The gas chromatograph was fitted with a capillary column VF-WAXms (30 m, 0.25 mm id, 0.36-µm film thickness; Agilent Technologies, Santa Clara,

CA). Full-scan mass spectra were recorded in the 40–90  $m/z$  range. Quantification was performed by integrating the extracted ion chromatogram peaks for the following ion species:  $m/z = 60$  for acetic acid at 9.7 min;  $m/z = 74$  for propionic acid at 11.3 min;  $m/z = 60$  for butyric acid at 12.5 min;  $m/z = 60$  for valeric acid at 13.9 min;  $m/z = 73$  for isobutyric acid at 11.9 min;  $m/z = 60$  for isovaleric acid at 13.0 and  $m/z = 88$  for 2-ethylbutyric acid at 14.2 min. The absolute levels of SCFAs were quantified using a calibration curve with prepared individual SCFAs and 2-ethylbutyric acid.

BAs were measured in lyophilized feces (approximately 10 mg). Samples were added to internal standards (d4-deoxycholic acid, d4-taurodeoxycholic acid, and d4-glycocholic acid; 200 ng/each) and mixed with 0.2 M NaOH (1 mL). The mixtures were then washed three times with hexane (1 mL), and the aqueous phases (0.7 mL) were applied to Oasis PRiME HLB 1 cc cartridges (Waters, Milford, MA) preconditioned with methanol (1 mL) followed by ultra-pure water (3 mL). The loaded cartridges were washed with ultra-pure water (0.5 mL), and the analytes were eluted with 1 mL of methanol:acetonitrile (1:1, v/v) for liquid chromatography–mass spectrometry analysis. BAs were analyzed using an ACQUITY UPLC system coupled to a Waters Xevo TQD MS. Separation was achieved using an ACQUITY UPLC BEH C18 column (2.1 × 150 mm, 1.7  $\mu$ m; Waters) using an acetonitrile-isopropanol (9:1, v/v) gradient in water containing 0.1% acetic acid (25% to 95% acetonitrile:isopropanol in 12 min). Analytes were detected using multiple reaction monitoring in negative ion electrospray mode with source and desolvation temperatures set to 150 °C and 600 °C, respectively. The absolute levels of BAs were quantified using a calibration curve with prepared

internal standards and individual BA as follows: cholic acid, glycocholic acid, taurocholic acid, deoxycholic acid, chenodeoxycholic acid, hyodeoxycholic acid, ursodeoxycholic acid, taurodeoxycholic acid, taurohyodeoxycholic acid, tauroursodeoxycholic acid, taurochenodeoxy cholic acid, glycodeoxycholic acid, glycohyodeoxycholic acid, glyoursodeoxycholic acid, glycochenodeoxycholic acid, lithocholic acid, tauroolithocholic acid, and tauroolithocholic acid. BAs were purchased from Steraloids Inc. (Newport, RI) or Tokyo Chemical Industry Co. LTD. (Tokyo, Japan).

#### ***Immunohistochemistry and morphometry of the pancreas***

Regarding pancreatic tissue processing, one block of formalin-fixed and paraffin-embedded pancreatic tissue was selected from each patient who underwent partial pancreatectomy. Samples were sectioned at a thickness of 4  $\mu$ m. Immunohistochemistry was performed using a Leica BOND-III automated stainer (Leica Biosystems, Wetzlar, Germany). Immunohistochemistry was performed with anti-glucagon antibody (lot H1808; rabbit polyclonal; premixed; Nichirei Bioscience, Tokyo, Japan) and anti-insulin antibody (clone K36aC102; mouse monoclonal; premixed; Nichirei Bioscience). For glucagon analysis, deparaffinized sections were heated in an antigen retrieval buffer (pH 9.0; Nichirei Bioscience) at 98 °C for 20 min. For insulin analysis, sections were digested using proteinase type XXIV (0.3 mg/mL; Sigma-Aldrich, St Louis, MO) at 37 °C for 15 min. Islet cells expressing ALDH1A3 were analyzed using antibodies against insulin (Agilent Technologies) and ALDH1A3 (Novus, Centennial, CO). Fluorescein isothiocyanate or Cy3-conjugated secondary antibodies (Jackson

ImmunoResearch, West Grove, PA) were used for fluorescence microscopy.

To determine the percentage of ALDH1A3-expressing cells in the islets (ALDH1A3<sup>+</sup> cells/islet), two random sections were selected per patient and 10 islets were randomly selected and evaluated per section. Images were captured using a Keyence BZ-X710 microscope using BZ-X software (Keyence, Osaka, Japan). ALDH1A3<sup>+</sup> cells/islets were determined as the average value of ALDH1A3<sup>+</sup> cells/islets in observed islets using BZ-X software in a blinded fashion by two independent investigators (K.S. and K.T.).

### ***Statistical analysis***

The normality of distribution of the continuous variables was evaluated using the Shapiro–Wilk test. Data are presented as the mean  $\pm$  standard deviation (SD) when variable distribution is normal, median with interquartile range when variable distribution is non normal, or the percentage. The  $\chi^2$  test or Fisher’s exact test were used to analyze categorical variables. Differences were analyzed using Student’s or paired *t*-tests, Mann–Whitney U-test, or Wilcoxon signed-rank test as appropriate for the data distribution. Analysis of similarities (ANOSIM) based on 1000 permutations was used to evaluate differences in microbial community composition between the PD and DP groups. The cumulative incidence of diabetes was estimated using the Kaplan–Meier method, and log-rank tests were used for comparisons between groups. Cox proportional hazard models were used to estimate hazard ratios with 95% CI of  $\alpha$ -cell or  $\beta$ -cell area,  $\alpha/\beta$  ratio, and ALDH1A3<sup>+</sup> cells/islet for PPDM in the DP group. Forward stepwise entry was used for the selection of covariates in the Cox proportional hazard model. *P* values

< 0.05 were considered statistically significant.

## ***References***

1. Matthews DR, Hosker JP, Rudenski AS, Naylor BA, Treacher DF, Turner RC. Homeostasis model assessment: insulin resistance and beta-cell function from fasting plasma glucose and insulin concentrations in man. *Diabetologia* 1985;28:412-419.
2. M Matsud, R A DeFronzo. Insulin sensitivity indices obtained from oral glucose tolerance testing: comparison with the euglycemic insulin clamp. *Diabetes Care* 1999; 22: 1462-1470.
3. Seltzer HS, Allen EW, Herron AL Jr, Brennan MT. Insulin secretion in response to glycemic stimulus: relation of delayed initial release to carbohydrate intolerance in mild diabetes mellitus. *J Clin Invest* 1967;46:323-335.
4. Fukuda T, Bouchi R, Takeuchi T, et al. Sarcopenic obesity assessed using dual energy X-ray absorptiometry (DXA) can predict cardiovascular disease in patients with type 2 diabetes: a retrospective observational study. *Cardiovasc Diabetol* 2018;17:55.
5. Howard Jack West, Jill O Jin. JAMA Oncology patient page. Performance status in patients with cancer. *JAMA Oncol* 2015;1:998.
6. Callahan BJ, McMurdie PJ, Rosen MJ, Han AW, Johnson AJ, Holmes SP. DADA2: High-resolution sample inference from Illumina amplicon data. *Nat Methods* 2016;13:581-583.

**Supplementary Table 1. The duration of follow-up and survival status of participants.**

| <b>Surgery</b> | <b>Disease</b> | <b>Age<br/>(years)</b> | <b>Sex</b> | <b>Total observational<br/>period (years)</b> | <b>Follow-up period<br/>(years)</b> | <b>PPDM</b> | <b>Status at the end of<br/>last follow-up</b> |
|----------------|----------------|------------------------|------------|-----------------------------------------------|-------------------------------------|-------------|------------------------------------------------|
| PD             | IPMN           | 71                     | male       | 5.16                                          | 1.68                                | 1           | Alive                                          |
| PD             | IPMN           | 44                     | female     | 3.05                                          | 3.05                                | 0           | Alive                                          |
| PD             | IPMN           | 55                     | female     | 3.24                                          | 3.24                                | 0           | Alive                                          |
| PD             | IPMN           | 65                     | male       | 3.72                                          | 3.72                                | 0           | Alive                                          |
| PD             | IPMN           | 68                     | male       | 4.87                                          | 4.87                                | 0           | Alive                                          |
| PD             | MCN            | 45                     | female     | 5.00                                          | 5.00                                | 0           | Alive                                          |
| PD             | NET            | 69                     | male       | 1.30                                          | 1.30                                | 0           | Dead (Interstitial Pneumonia)                  |
| PD             | NET            | 55                     | male       | 5.41                                          | 3.01                                | 1           | Alive                                          |
| PD             | NET            | 65                     | female     | 3.59                                          | 3.59                                | 0           | Alive                                          |
| PD             | NET            | 56                     | female     | 3.79                                          | 3.79                                | 0           | Alive                                          |
| PD             | NET            | 57                     | male       | 3.89                                          | 3.89                                | 0           | Alive                                          |
| PD             | NET            | 69                     | male       | 4.13                                          | 4.13                                | 0           | Alive                                          |
| PD             | NET            | 74                     | female     | 4.14                                          | 4.14                                | 0           | Alive                                          |
| PD             | NET            | 47                     | female     | 4.18                                          | 4.18                                | 0           | Alive                                          |
| PD             | NET            | 73                     | female     | 4.46                                          | 4.46                                | 0           | Alive                                          |
| PD             | NET            | 55                     | female     | 4.47                                          | 4.47                                | 0           | Alive                                          |
| PD             | NET            | 65                     | female     | 4.71                                          | 4.71                                | 0           | Alive                                          |
| PD             | NET            | 63                     | male       | 4.91                                          | 4.91                                | 0           | Alive                                          |
| PD             | NET            | 67                     | male       | 5.42                                          | 5.42                                | 0           | Alive                                          |
| PD             | NET            | 57                     | male       | 5.54                                          | 5.54                                | 0           | Alive                                          |
| DP             | SV             | 40                     | male       | 1.23                                          | 0.61                                | 1           | Alive                                          |
| DP             | SV             | 64                     | female     | 4.35                                          | 4.35                                | 0           | Alive                                          |
| DP             | IPMN           | 79                     | female     | 5.47                                          | 0.03                                | 1           | Alive                                          |
| DP             | IPMN           | 49                     | male       | 5.77                                          | 0.10                                | 1           | Alive                                          |
| DP             | IPMN           | 56                     | female     | 5.28                                          | 2.50                                | 1           | Alive                                          |
| DP             | IPMN           | 68                     | female     | 5.27                                          | 2.97                                | 1           | Alive                                          |
| DP             | IPMN           | 62                     | female     | 5.15                                          | 5.15                                | 0           | Alive                                          |

|    |     |    |        |      |      |   |                            |
|----|-----|----|--------|------|------|---|----------------------------|
| DP | MCN | 58 | male   | 3.76 | 0.51 | 1 | Alive                      |
| DP | MCN | 63 | female | 4.58 | 2.49 | 1 | Alive                      |
| DP | MCN | 32 | female | 3.04 | 3.04 | 0 | Alive                      |
| DP | MCN | 42 | female | 3.99 | 3.99 | 0 | Alive                      |
| DP | MCN | 63 | male   | 4.48 | 4.48 | 0 | Alive                      |
| DP | NET | 58 | male   | 4.11 | 0.08 | 1 | Alive                      |
| DP | NET | 49 | female | 4.66 | 0.52 | 1 | Alive                      |
| DP | NET | 61 | male   | 2.65 | 0.58 | 1 | Alive                      |
| DP | NET | 72 | male   | 4.15 | 0.59 | 1 | Alive                      |
| DP | NET | 46 | female | 5.14 | 5.14 | 0 | Alive                      |
| DP | NET | 62 | female | 3.03 | 0.68 | 1 | Alive                      |
| DP | NET | 54 | female | 3.03 | 0.97 | 1 | Alive                      |
| DP | NET | 66 | female | 2.93 | 0.99 | 1 | Alive                      |
| DP | NET | 49 | female | 5.81 | 1.01 | 1 | Alive                      |
| DP | NET | 58 | male   | 4.56 | 1.33 | 1 | Alive                      |
| DP | NET | 60 | male   | 1.67 | 1.67 | 0 | Alive                      |
| DP | NET | 61 | female | 3.14 | 3.14 | 0 | Alive                      |
| DP | NET | 51 | female | 4.10 | 4.10 | 0 | Alive                      |
| DP | NET | 62 | female | 4.65 | 4.65 | 0 | Alive                      |
| DP | NET | 35 | male   | 5.45 | 5.45 | 0 | Alive                      |
| DP | NET | 48 | female | 1.48 | 1.48 | 0 | Dead (Cerebral hemorrhage) |

Total observational period was defined as the time between the date of surgery and the date of last visit to our hospital.

Follow-up period was defined as the time between the date of surgery and the date of last visit to our hospital in patients who did not develop PPDM, or the time between the date of surgery and the date of diagnosis of diabetes in patients who developed PPDM.

**Abbreviations:** DP, distal pancreatectomy; PD, pancreatoduodenectomy; PPDM, post pancreatectomy diabetes; MCN, mucinous cystic neoplasm; NET, neuroendocrine tumor; SV, splenic varices

**Supplementary Table 2. Cox regression models for estimating the association between  $\alpha$ -cell area,  $\beta$ -cell area, or  $\alpha/\beta$  ratio and post-pancreatectomy diabetes in patients who underwent distal pancreatectomy.**

|                                                                                                                         | β-cell area |              |         | α-cell area |              |         | α/β ratio |               |         |
|-------------------------------------------------------------------------------------------------------------------------|-------------|--------------|---------|-------------|--------------|---------|-----------|---------------|---------|
|                                                                                                                         | HR          | (95% CI)     | P value | HR          | (95% CI)     | P value | HR        | (95% CI)      | P value |
| Univariate model                                                                                                        |             |              |         |             |              |         |           |               |         |
| β-cell area (%)                                                                                                         | 2.54        | (1.07-5.98)  | 0.033   | NA          |              |         | NA        |               |         |
| α-cell area (%)                                                                                                         | NA          |              |         | 4.28        | (1.28-14.21) | 0.018   | NA        |               |         |
| α/β ratio                                                                                                               | NA          |              |         | NA          |              |         | 13.94     | (0.75-256.46) | 0.076   |
| Multivariate model                                                                                                      |             |              |         |             |              |         |           |               |         |
| β-cell area                                                                                                             | 3.96        | (1.26-10.79) | 0.017   | NA          |              |         | NA        |               |         |
| α-cell area                                                                                                             | NA          |              |         | 6.45        | (1.62-25.66) | 0.008   | NA        |               |         |
| α/β ratio                                                                                                               | NA          |              |         | NA          |              |         | 17.08     | (1.03-281.52) | 0.048   |
| γ-GTP (IU/l)                                                                                                            | 1.02        | (1.01-1.04)  | 0.010   | 1.02        | (1.00-1.04)  | 0.019   | NA        |               |         |
| PG AUC (mg/dl•Hour)                                                                                                     | 1.03        | (1.01-1.05)  | <0.001  | 1.03        | (1.01-1.05)  | <0.001  | 1.03      | (1.02-1.05)   | <0.001  |
| Total bilirubin (mg/dl)                                                                                                 |             |              |         |             |              |         | 18.09     | (2.00-163.06) | 0.010   |
| Insulin resistance adjusted multivariate model                                                                          |             |              |         |             |              |         |           |               |         |
| β-cell area                                                                                                             | 3.68        | (1.25-10.82) | 0.018   | NA          |              |         | NA        |               |         |
| α-cell area                                                                                                             | NA          |              |         | 6.46        | (1.61-25.79) | 0.008   | NA        |               |         |
| α/β ratio                                                                                                               | NA          |              |         | NA          |              |         | 28.47     | (1.40-664.40) | 0.029   |
| γ-GTP (IU/l)                                                                                                            | 1.02        | (1.00-1.04)  | 0.020   | 1.02        | (1.00-1.04)  | 0.034   | NA        |               |         |
| PG AUC (mg/dl•Hour)                                                                                                     | 1.03        | (1.01-1.05)  | 0.004   | 1.03        | (1.01-1.05)  | 0.003   | 1.03      | (1.01-1.05)   | 0.001   |
| Matsuda index                                                                                                           | 0.99        | (0.77-1.27)  | 0.940   | 1.00        | (0.78-1.28)  | 0.993   | 1.00      | (0.80-1.24)   | 0.946   |
| AUC, area under the curve; HR, hazard ratio; CI, Confidence interval; GTP, glutamyl transpeptidase; PG, plasma glucose. |             |              |         |             |              |         |           |               |         |

**Supplementary Table 3. Baseline clinical characteristics of patients who underwent distal pancreatectomy and measurement of ALDH1A3-immunoreactivity**

|                                      | Progressor          | Non-progressor      | P value |
|--------------------------------------|---------------------|---------------------|---------|
| Number                               | 6                   | 10                  |         |
| Age (years)                          | 57.9 ± 6.8          | 50.0 ± 11.5         | 0.146   |
| Gender (%male)                       | 16.7                | 30                  | 0.551   |
| Body mass index (kg/m <sup>2</sup> ) | 23.6 ± 2.7          | 23.0 ± 2.7          | 0.675   |
| Current smoker (%)                   | 0                   | 0                   | 1.000   |
| HbA1c (%)                            | 5.9 ± 0.3           | 5.8 ± 0.3           | 0.529   |
| HbA1c (mmol/mol)                     | 40.4 ± 3.4          | 39.3 ± 3.0          | 0.529   |
| GA (%)                               | 13.7 ± 1.9          | 14.1 ± 1.6          | 0.680   |
| Triglycerides (mmol/L)               | 1.2 (1.0-2.3)       | 1.1 (0.7-1.4)       | 0.254   |
| HDL cholesterol (mmol/L)             | 1.4 ± 0.2           | 1.6 ± 0.4           | 0.127   |
| LDL cholesterol (mmol/L)             | 2.8 ± 0.8           | 2.8 ± 0.6           | 0.892   |
| Total bilirubin (mg/dL)              | 0.9 ± 0.3           | 0.9 ± 0.3           | 0.622   |
| AST (U/L)                            | 21.5 (18.0-22.0)    | 17.5 (15.5-22.0)    | 0.703   |
| ALT (U/L)                            | 21.0 (17.5-23.0)    | 14.0 (10.3-17.3)    | 0.092   |
| γ-GTP (U/L)                          | 26.5 (16.5-31.3)    | 18.5 (17.2-29.0)    | 0.551   |
| UA (μmol/L)                          | 324.8 (256.7-388.6) | 267.6 (257.2-290.0) | 0.515   |
| Amylase (U/L)                        | 74.0 (69.0-85.0)    | 86.0 (69.5-92.0)    | 0.514   |
| Lipase (U/L)                         | 35.5 (29.0-40.5)    | 30.5 (29.3-32.0)    | 0.326   |
| Creatinine (mg/dL)                   | 0.6 ± 0.1           | 0.7 ± 0.2           | 0.117   |
| eGFR (mL/min/1.73m <sup>2</sup> )    | 84.6 ± 11.1         | 77.0 ± 20.3         | 0.425   |
| 75g OGTT                             |                     |                     |         |
| Glucose (mg/dL)                      |                     |                     |         |
| Fasting                              | 91.8 ± 3.5          | 87.2 ± 4.8          | 0.068   |
| 30min                                | 162.6 ± 38.1        | 134.4 ± 22.8        | 0.098   |
| 60min                                | 179.3 ± 43.6        | 130.4 ± 28.6        | 0.022   |
| 120min                               | 124.0 ± 13.7        | 118.9 ± 12.5        | 0.469   |
| Insulin (μU/mL)                      |                     |                     |         |
| Fasting                              | 7.2 (6.9-8.6)       | 3.8 (3.0-4.5)       | 0.004   |
| 30min                                | 39.3 (31.6-64.5)    | 27.2 (20.7-52.7)    | 0.313   |

|                      |                     |                     |        |
|----------------------|---------------------|---------------------|--------|
| 60min                | 76.6 (41.9-91.2)    | 22.6 (18.8-39.6)    | 0.016  |
| 120min               | 73.6 (48.4-86.5)    | 25.6 (17.8-31.4)    | 0.005  |
| Glucagon (pg/mL)     |                     |                     |        |
| Fasting              | 97.0 (86.0-114.0)   | 105.0 (106.0-112.5) | 0.415  |
| 30min                | 107.0 (100.3-111.5) | 105.5 (92.0-114.8)  | 0.832  |
| 60min                | 95.5 (84.8-104.0)   | 97.0 (88.2-105.2)   | 0.875  |
| 120min               | 99.5 (95.0-103.3)   | 98.5 (87.5-109.5)   | 0.587  |
| GLP-1 (pmol/L) (n=9) |                     |                     |        |
| Fasting              | 1.6 (0.8-1.7)       | 1.8 (0.8-2.6)       | 0.413  |
| 30min                | 5.8 (5.6-7.0)       | 6.3 (3.5-7.5)       | 0.742  |
| 60min                | 4.4 (2.1-4.8)       | 4.5 (2.0-4.8)       | 0.871  |
| 120min               | 3.2 (2.8-4.6)       | 4.9 (4.1-5.4)       | 0.224  |
| HOMA-IR              | 1.8 ± 0.6           | 0.8 ± 0.4           | <0.001 |
| Matsuda index        | 4.6 ± 1.0           | 9.9 ± 2.0           | 0.002  |
| HOMA-β               | 96.6 ± 22.6         | 53.0 ± 14.4         | 0.003  |
| Insulinogenic index  | 0.7 (0.5-0.9)       | 0.6 (0.4-0.8)       | 0.893  |
| Urinary C-peptide    | 16.9 (14.5-20.8)    | 1.2 (16.0-17.9)     | 0.875  |
| (nmol/day)           |                     |                     |        |
| β-cell area (%)      | 1.34 ± 0.37         | 1.01 ± 0.40         | 0.145  |
| α-cell area (%)      | 0.62 ± 0.41         | 0.38 ± 0.29         | 0.093  |
| α/β ratio            | 0.46 ± 0.12         | 0.34 ± 0.16         | 0.076  |
| Primary disease (%)  |                     |                     |        |
| NET                  | 5 (83%)             | 7 (67%)             | 0.551  |
| MCN                  | 1 (17%)             | 3 (33%)             | 0.551  |

Data are shown as mean ± SD or median (interquartile range).

ALT, alanine transaminase; AST, aspartate transaminase; DBP, diastolic blood pressure; eGFR, estimated glomerular filtration ratio; GA, glycoalbumin; GLP-1, glucagon-like peptide-1; GTP, glutamyl transpeptidase; HbA1c, hemoglobin A1c; HOMA-IR, homeostatic model assessment of insulin resistance; HOMA-β, homeostatic model assessment of β-cell function; MCN, mucinous cystic neoplasm; NET, neuroendocrine tumor; OGTT, oral glucose tolerance test; SBP, systolic blood pressure; UA, uric acid.

P value represents the difference among the four groups in percent (Chi-square test), mean (t-test), or median (Mann-Whitney U test)

**Supplementary Table 4. Baseline clinical characteristics of patients who underwent pancreatoduodenectomy and measurement of ALDH1A3-immunoreactivity.**

|                                      | Progressor           | Non-progressor      | P value |
|--------------------------------------|----------------------|---------------------|---------|
| Number                               | 5                    | 6                   |         |
| Age (years)                          | 54.4 ± 12.9          | 58.8 ± 4.9          | 0.448   |
| Gender (%male)                       | 20.0                 | 33.3                | 0.621   |
| Body mass index (kg/m <sup>2</sup> ) | 21.5 ± 3.2           | 22.5 ± 2.3          | 0.565   |
| Current smoker (%)                   | 0                    | 0                   | 1.000   |
| HbA1c (%)                            | 5.6 ± 0.3            | 5.7 ± 0.3           | 0.346   |
| HbA1c (mmol/mol)                     | 37.3 ± 3.6           | 39.1 ± 2.8          | 0.346   |
| GA (%)                               | 14.4 ± 1.5           | 14.0 ± 0.7          | 0.589   |
| Triglycerides (mmol/L)               | 0.8 (0.6-1.4)        | 0.9 (0.8-1.1)       | 0.927   |
| HDL cholesterol (mmol/L)             | 1.6 ± 0.2            | 1.5 ± 0.4           | 0.647   |
| LDL cholesterol (mmol/L)             | 3.2 ± 0.8            | 3.2 ± 0.8           | 0.647   |
| Total bilirubin (mg/dl)              | 1.2 ± 0.4            | 0.7 ± 0.3           | 0.082   |
| AST (U/L)                            | 14.0 (12.5-18.5)     | 15.5 (13.8-18.0)    | 0.781   |
| ALT (U/L)                            | 9.0 (6.5-13.5)       | 13.5 (10.8-20.2)    | 0.143   |
| γ-GTP (U/L)                          | 15.0 (10.5-32.5)     | 19.5 (13.8-64.5)    | 0.360   |
| UA (μmol/L)                          | 327.18 (202.2-374.7) | 285.5 (165.1-346.5) | 0.552   |
| Amylase (U/L)                        | 66.0 (58.0-75.5)     | 70.0 (55.5-82.3)    | 0.714   |
| Lipase (U/L)                         | 24.0 (20.0-29.5)     | 33.0 (26.8-44.2)    | 0.067   |
| Creatinine (mg/dL)                   | 0.7 ± 0.2            | 0.7 ± 0.2           | 0.927   |
| eGFR (mL/min/1.73m <sup>2</sup> )    | 73.9 ± 23.1          | 71.1 ± 14.6         | 0.810   |
| 75g OGTT                             |                      |                     |         |
| Glucose (mg/dl)                      |                      |                     |         |
| Fasting                              | 82.0 ± 2.4           | 87.0 ± 3.4          | 0.019   |
| 30min                                | 135.4 ± 16.6         | 153.3 ± 16.6        | 0.108   |
| 60min                                | 107.8 ± 34.5         | 144.7 ± 23.8        | 0.065   |
| 120min                               | 120.2 ± 16.2         | 113.5 ± 24.0        | 0.610   |
| Insulin (μU/mL)                      |                      |                     |         |
| Fasting                              | 5.2 (2.9-7.3)        | 4.9 (3.5-5.9)       | 0.931   |
| 30min                                | 36.5 (17.4-100.3)    | 37.7 (33.8-86.3)    | 0.662   |

|                     |                    |                    |       |
|---------------------|--------------------|--------------------|-------|
| 60min               | 24.4 (14.2-50.2)   | 27.3 (17.5-74.7)   | 0.792 |
| 120min              | 25.6 (17.8-42.5)   | 21.7 (13.6-30.1)   | 0.449 |
| Glucagon (pg/mL)    |                    |                    |       |
| Fasting             | 105.0 (94.5-134.0) | 97.0 (88.5-114.5)  | 0.360 |
| 30min               | 106.5 (83.3-123.5) | 106.5 (83.3-123.5) | 0.662 |
| 60min               | 100.0 (87.0-120.0) | 96.5 (81.5-113.0)  | 0.792 |
| 120min              | 106.0 (89.5-124.5) | 94.0 (81.5-108.8)  | 0.329 |
| GLP-1 (pmol/L)      |                    |                    |       |
| Fasting             | 1.4 (1.1-2.6)      | 1.0 (0.8-3.9)      | 0.644 |
| 30min               | 8.4 (3.1-29.5)     | 6.4 (5.2-12.9)     | 0.931 |
| 60min               | 5.8 (2.5-15.5)     | 5.6 (3.2-8.9)      | 0.582 |
| 120min              | 5.2 (2.3-7.4)      | 3.1 (2.2-6.9)      | 0.662 |
| HOMA-IR             | 1.0 ± 0.5          | 1.0 ± 0.3          | 0.159 |
| Matsuda index       | 10.9 ± 5.6         | 9.1 ± 3.4          | 0.533 |
| HOMA-β              | 95.4 ± 37.0        | 70.6 ± 13.5        | 0.159 |
| Insulinogenic index | 0.5 (0.4-1.5)      | 0.6 (0.4-1.2)      | 0.931 |
| Urinary C-peptide   | 11.2 (6.9-21.0)    | 15.1 (8.9-26.3)    | 0.662 |
| (nmol/day)          |                    |                    |       |
| β-cell area (%)     | 0.87 ± 0.25        | 0.80 ± 0.33        | 0.723 |
| α-cell area (%)     | 0.26 ± 0.09        | 0.22 ± 0.21        | 0.429 |
| α/β ratio           | 0.31 ± 0.09        | 0.25 ± 0.14        | 0.756 |
| Primary disease (%) |                    |                    |       |
| NET                 | 3 (60%)            | 4 (66%)            | 0.819 |
| IPMN                | 1 (20%)            | 2 (33%)            | 0.621 |
| MCN                 | 1 (20%)            | 0 (0%)             | 0.454 |

Data are mean ± SD or median (interquartile range).

ALT, alanine transaminase; AST, aspartate transaminase; DBP, diastolic blood pressure; eGFR, estimated glomerular filtration ratio; GA, glycoalbumin; GLP-1, glucagon-like peptide-1; GTP, glutamyl transpeptidase; HbA1c, hemoglobin A1c; HOMA-IR, homeostatic model assessment of insulin resistance; HOMA-β, homeostatic model assessment of β-cell function; IPMN, intraductal papillary; MCN, mucinous cystic neoplasm; NET, neuroendocrine tumor; OGTT, oral glucose tolerance test; SBP, systolic blood pressure; UA, uric acid.

P value represents the difference among the four groups in percent (Chi-square test), mean (t-test), or median (Mann-Whitney U test)

**PD: pancreatoduodenectomy**

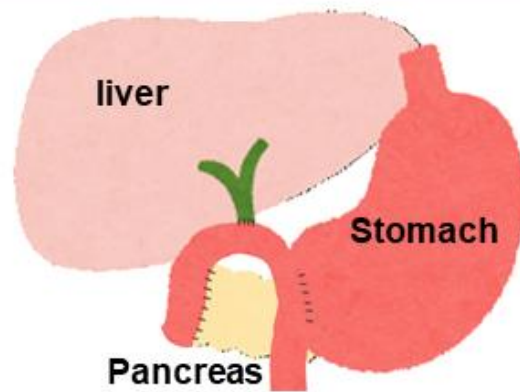

Including partial resection of pancreas  
+  
Including bypass of the proximal intestine

**DP: distal pancreatectomy**

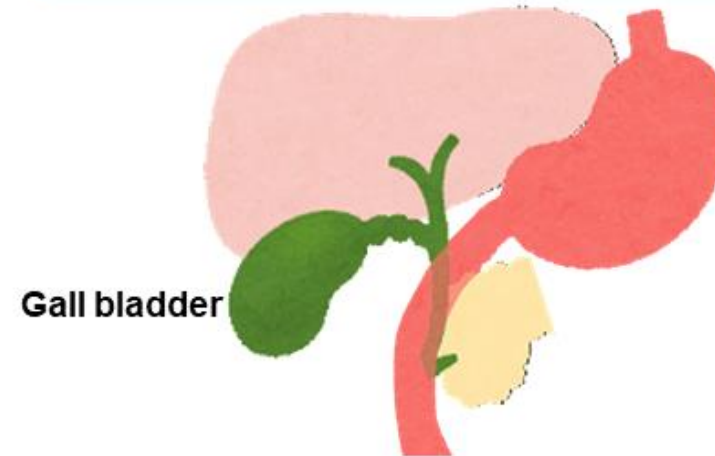

Including partial resection of pancreas  
+  
**NOT** including bypass of the proximal intestine

Supplementary Figure 1. Diagram illustrating the surgical procedure of pancreatoduodenectomy (PD) and distal pancreatectomy (DP).



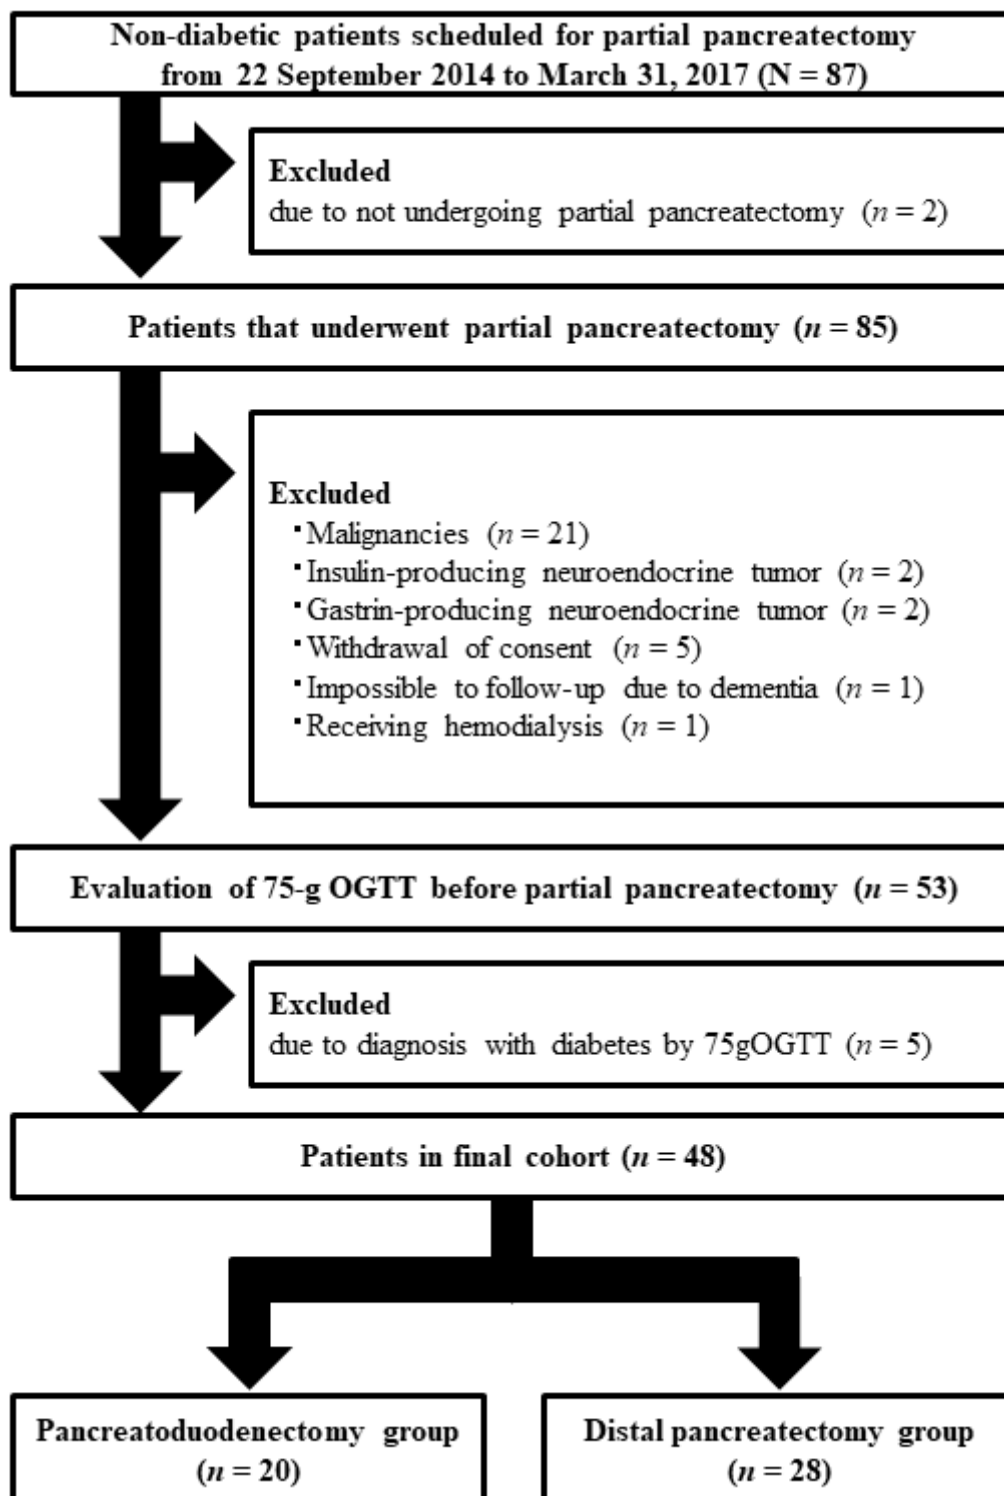

Supplementary Figure 2. Study flowchart

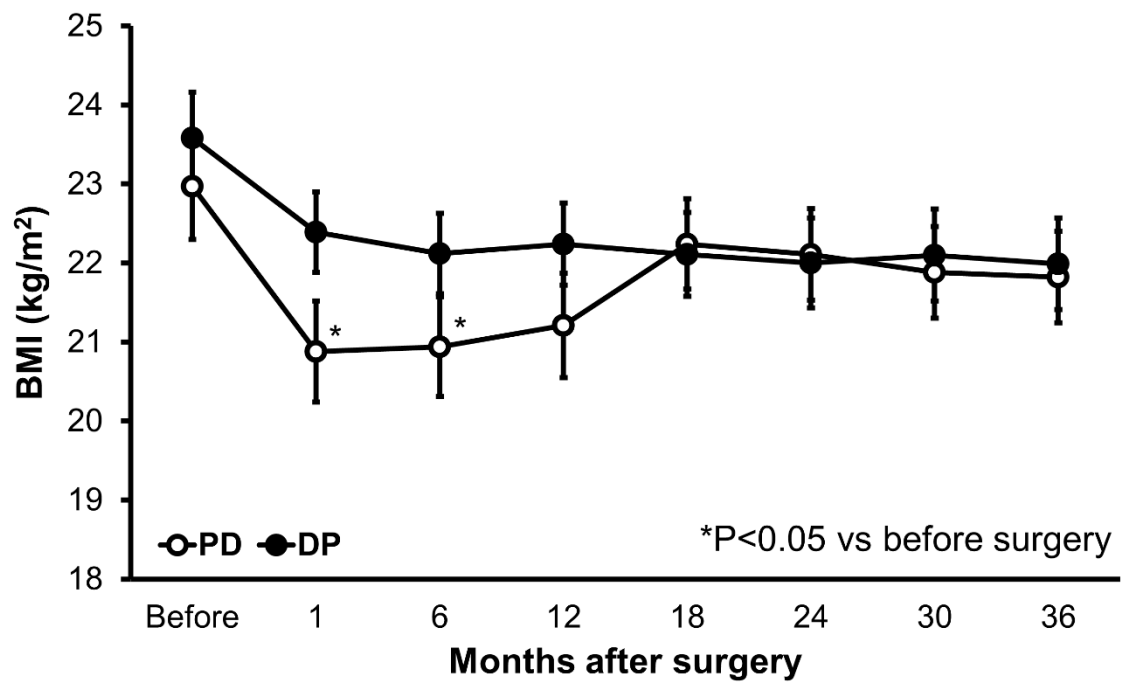

|                    |    |    |    |    |    |    |    |    |
|--------------------|----|----|----|----|----|----|----|----|
| PD                 | 20 | 20 | 20 | 20 | 19 | 19 | 19 | 19 |
| DP                 | 28 | 28 | 28 | 27 | 26 | 25 | 25 | 24 |
| Number of patients |    |    |    |    |    |    |    |    |

### Supplementary Figure 3. Changes in BMI after partial pancreatectomy.

The number of patients who developed diabetes after surgery. Data are presented as mean  $\pm$  SEM. PD, pancreatoduodenectomy; DP, distal pancreatectomy.

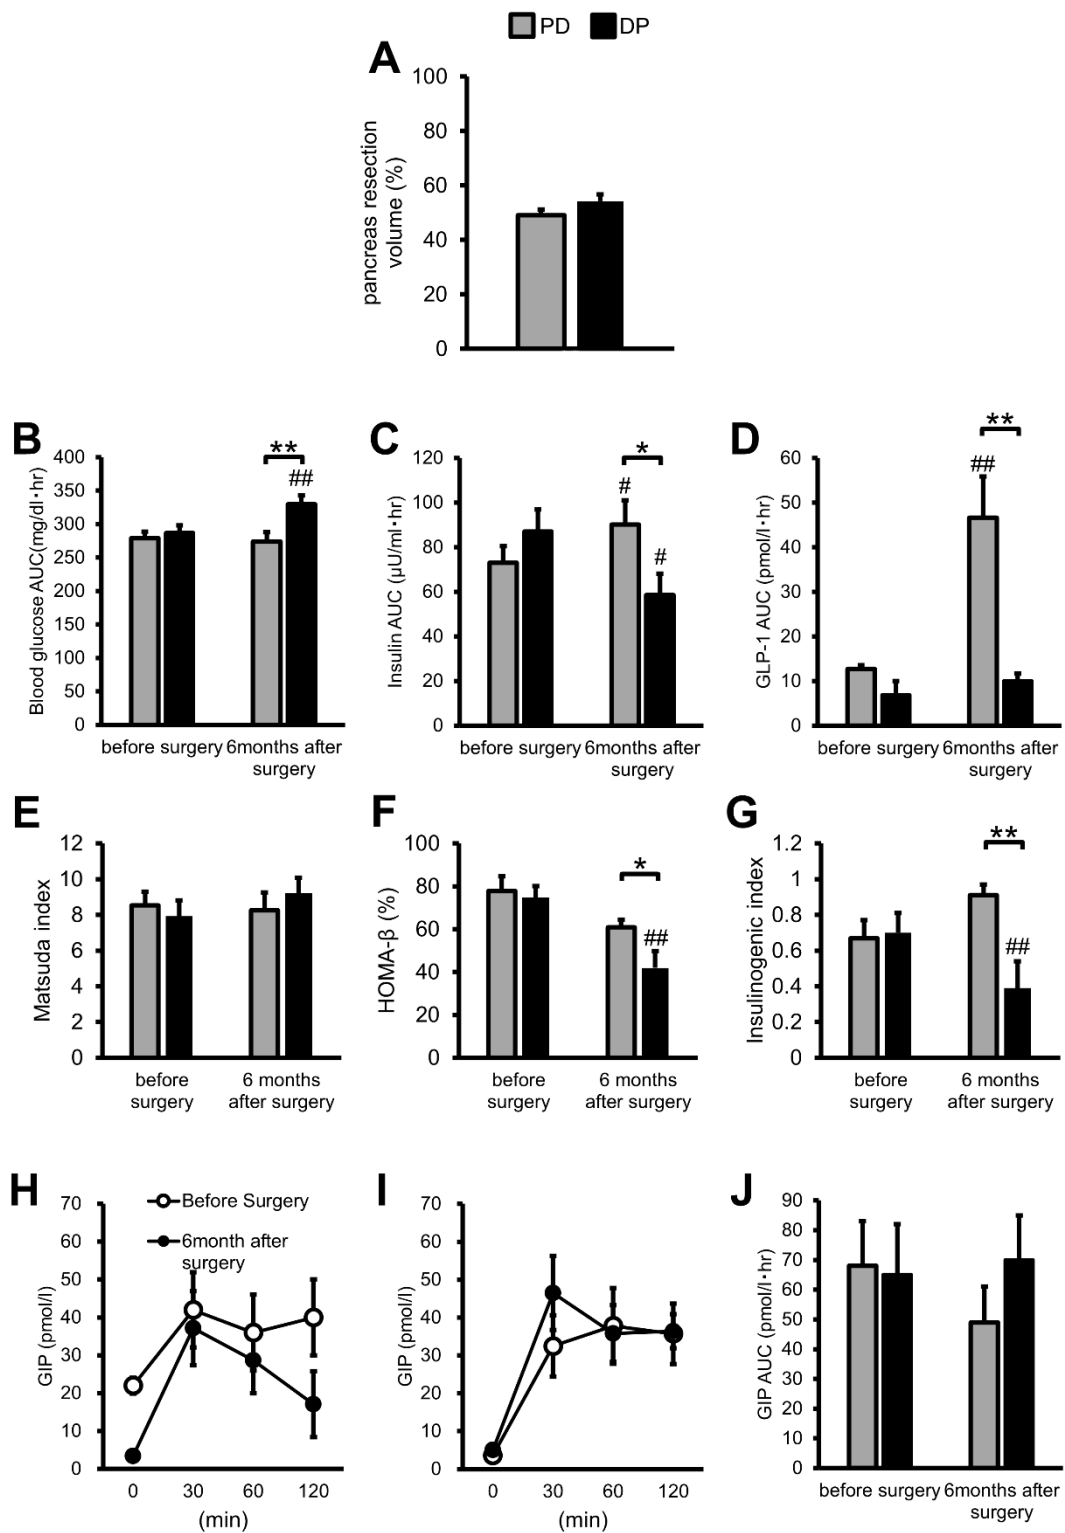

**Supplementary Figure 4. Additional data regarding changes in glucose metabolism, insulin, GLP-1, and GIP secretion before and after partial pancreatectomy.**

*A*: Pancreas resection volume in the PD and DP group.

*B–D*: Area under the curve (AUC) during 75 g OGTT for glucose (*B*), insulin (*C*), and GLP-1(*D*) before and 6 months after surgery of patients who underwent PD (*n* = 20) and DP (before surgery, *n* = 28; 6 months after surgery, *n* = 27).

*E–G*: Matsuda index (*E*), HOMA- $\beta$  (*F*), and II (*G*) before and 6 months after surgery of patients who underwent PD (*n* = 20) and DP (before surgery, *n* = 28; 6 months after surgery, *n* = 27).

*H, I*: GIP concentrations during 75 g oral glucose tolerance test performed before (open circles) and 6 months after (closed circles) surgery in patients who underwent PD (*H*; *n* = 5) or DP (*I*; *n* = 8).

*J*: AUC during 75 g OGTT of GIP before and 6 months after surgery in patients who underwent PD (*n* = 5) and DP (*n* = 8).

Data are presented as mean  $\pm$  SEM. \**P* < 0.05 \*\**P* < 0.01 at individual time points; #*P* < 0.01, ###*P* < 0.01 vs. before surgery.

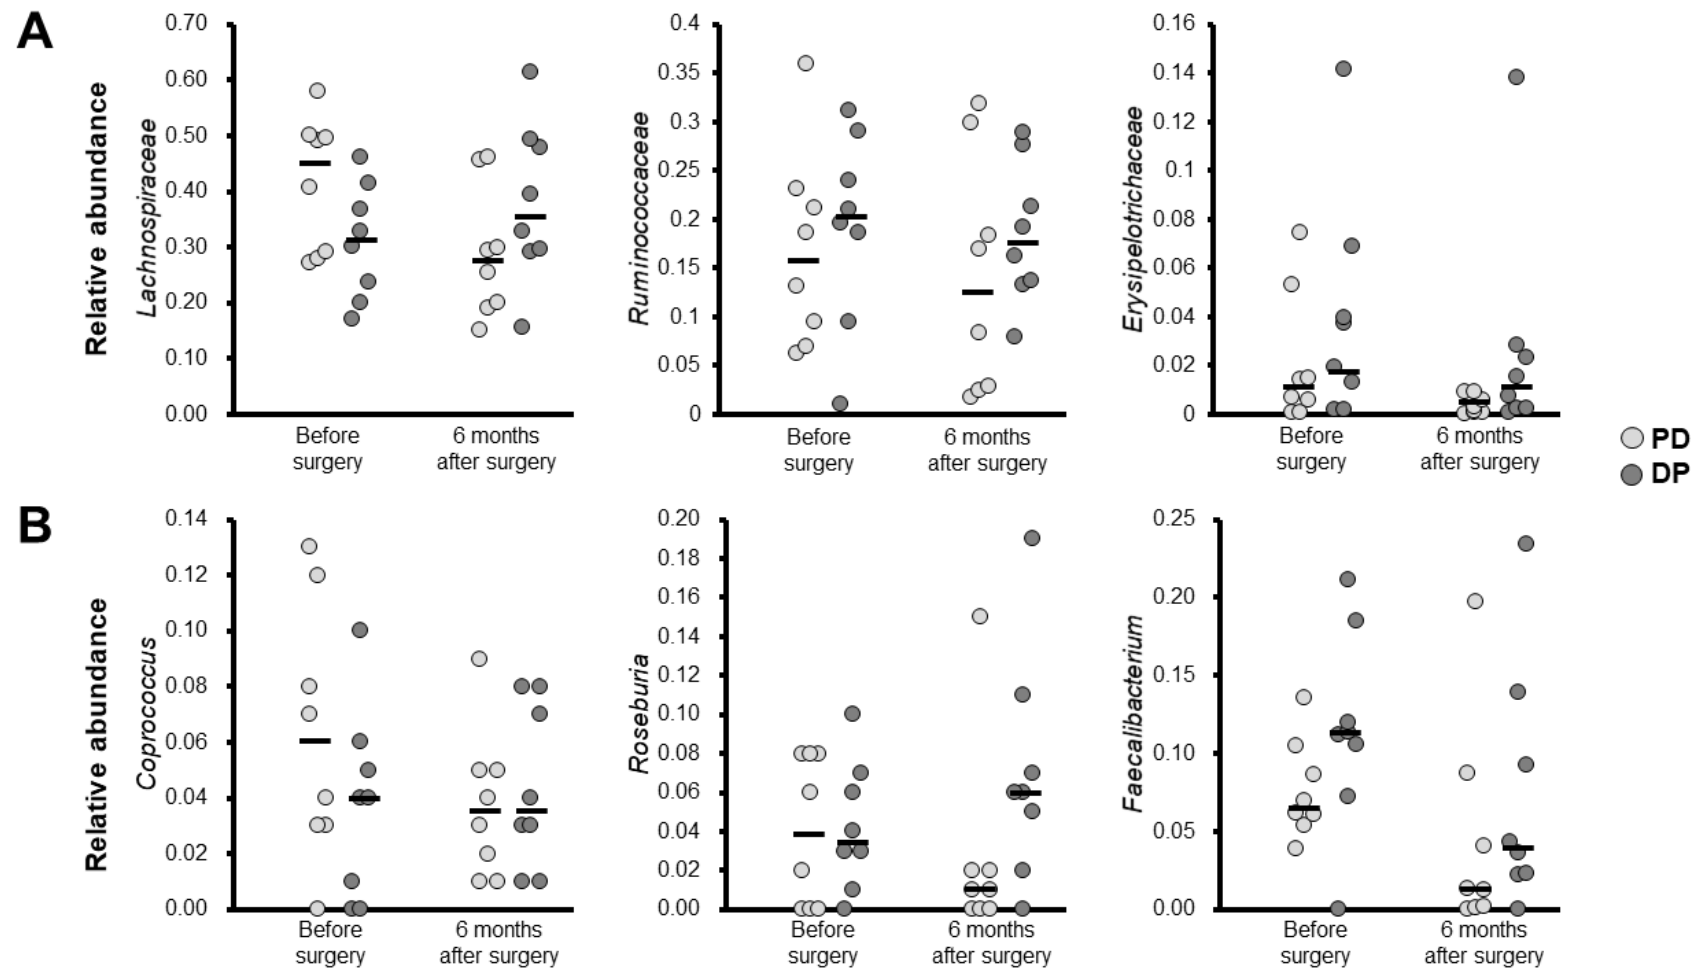

**Supplementary Figure 5. The relative abundance of gut microbiota species that produce butyrate.**

*A*: Relative abundance at the family level in patients who underwent PD ( $n = 8$ ) and DP ( $n = 8$ ).

*B*: Relative abundance at the genus level in patients who underwent PD ( $n = 8$ ) and DP ( $n = 8$ ). Black bars represent median values.

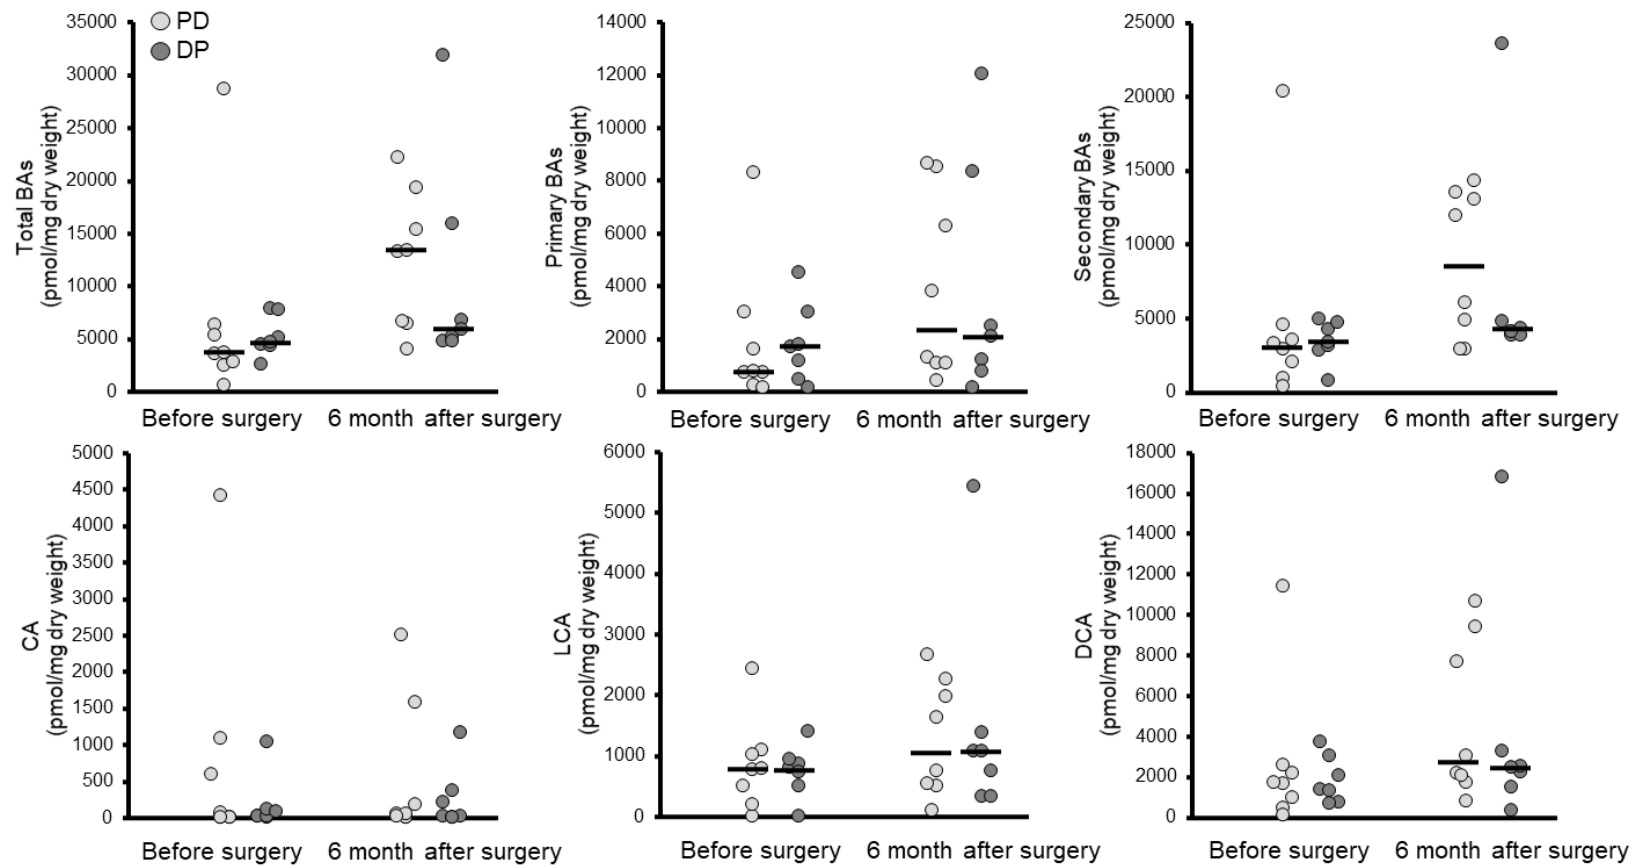

**Supplementary Figure 6. Fecal concentrations of bile acids.**

A: Bile acid (BA) levels in fecal samples before and 6 months after surgery in patients who underwent PD ( $n = 8$ ) and DP ( $n = 8$ ). Black bars represent median values. CA, cholic acid; DCA, deoxycholic acid; LCA, lithocholic acid. # $P < 0.01$ , ## $P < 0.01$  vs. before surgery

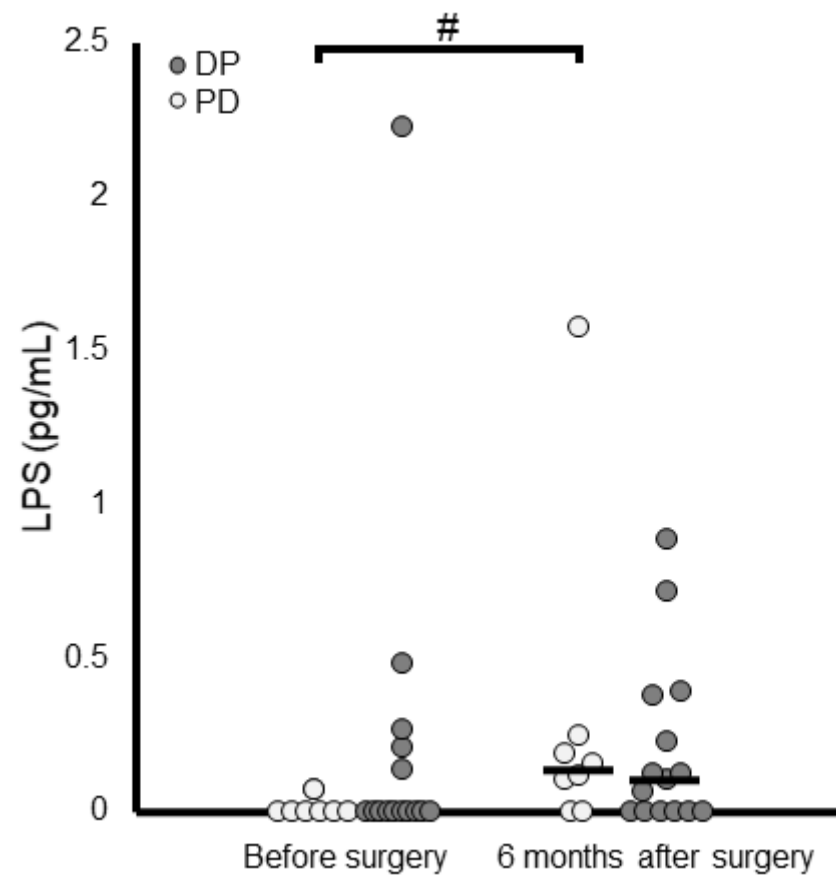

**Supplementary Figure 7. Serum levels of lipopolysaccharides (LPS).**

LPS levels were measured before and 6 months after surgery in patients who underwent PD ( $n = 8$ ) and DP ( $n = 15$ ).

# $P < 0.01$ , ## $P < 0.01$  vs. before surgery

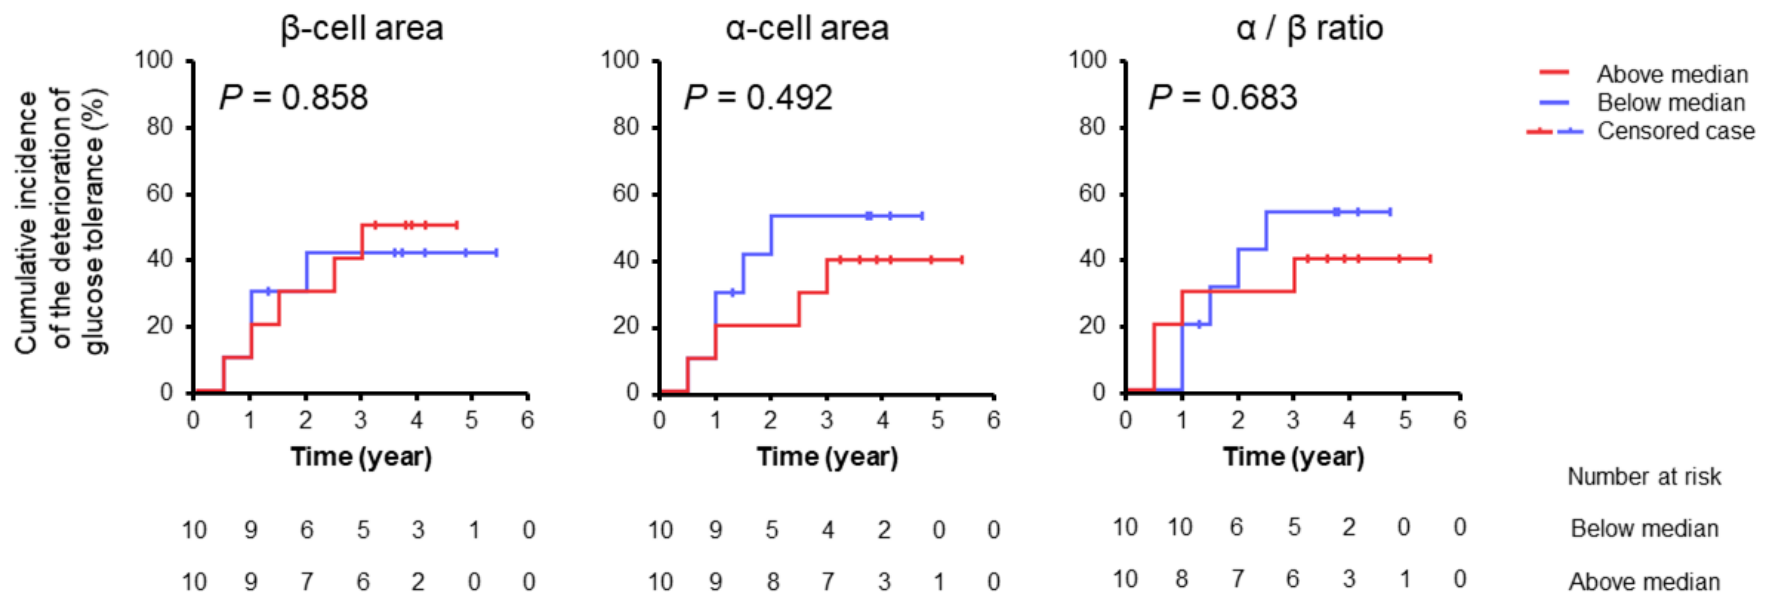

**Supplementary Figure 8. The association between  $\alpha$ -cell area,  $\beta$ -cell area, or  $\alpha/\beta$  ratio, and the deterioration of glucose tolerance in patients who underwent pancreatoduodenectomy.**

Kaplan-Meier curves for estimating the cumulative incidence of the deterioration of glucose tolerance after pancreatoduodenectomy, according to the median of  $\beta$ -cell area,  $\alpha$ -cell area, or  $\alpha/\beta$  ratio.

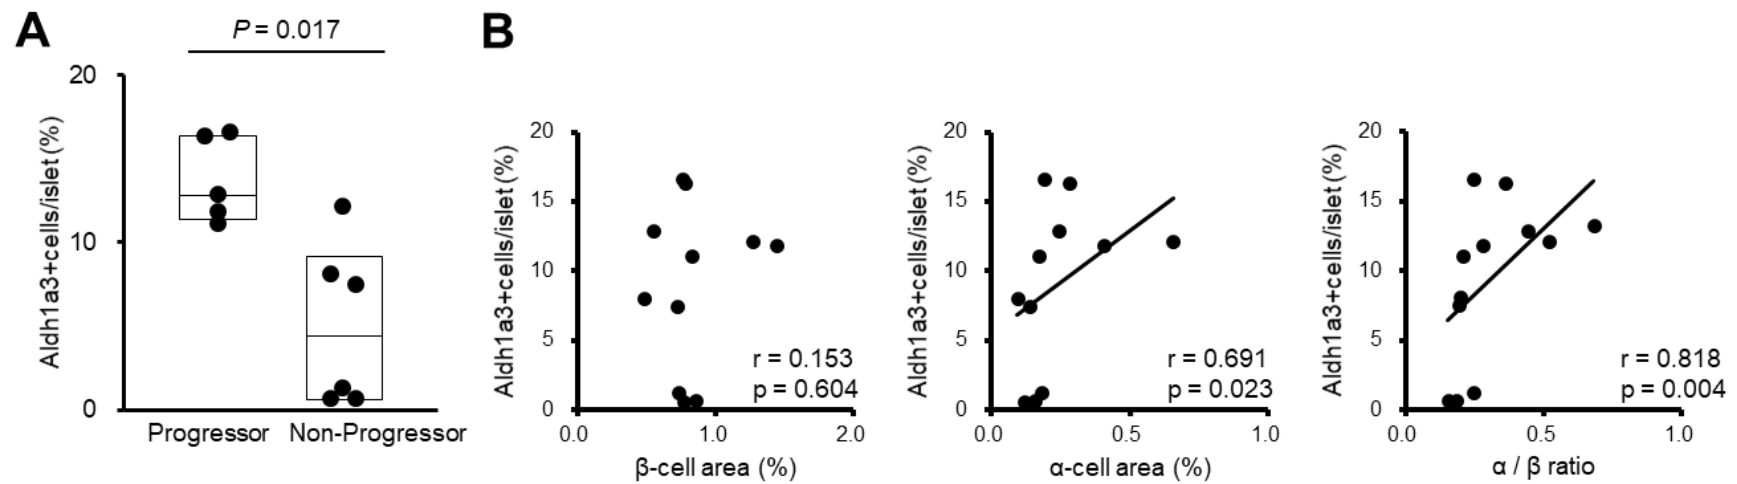

**Supplementary Figure 9. ALDH1A3 expression in patients who underwent PD.**

*A*: Quantitative analysis of ALDH1A3-positive cells per islet in resected pancreas of progressors ( $n = 5$ ) and non-progressors ( $n = 6$ ) who underwent PD. Box plot indicates the median and interquartile range.

*B*: Correlations between  $\alpha$ -cell area,  $\beta$ -cell area, or  $\alpha/\beta$  ratio and ALDH1A3-positive cells per islet in patients who underwent PD ( $n = 11$ ).
